# Supplementary material
Source: publisher figshare collection journal article supplement (https://acs.figshare.com/ndownloader/files/12333521)
Supplement: Supplementary file 1 [file 12333521]

## Supporting Information

to

### Fluorinated Gold Nanoparticles for Nanostructure Imaging Mass Spectrometry

Amelia Palermo<sup>1+</sup>, Erica M. Forsberg<sup>2+</sup>, Benedikt Warth<sup>3</sup>, Aries E. Aisporna<sup>1</sup>, Elizabeth Billings<sup>1</sup>, Ellen Kuang<sup>2</sup>, H. Paul Benton<sup>1</sup>, David Berry<sup>4</sup>, Gary Siuzdak<sup>1,5\*</sup>

<sup>1</sup>Scripps Center for Metabolomics, The Scripps Research Institute, 10550 North Torrey Pines Rd., La Jolla, CA, 92037, USA

<sup>2</sup>Department of Chemistry and Biochemistry, San Diego State University, 5500 Campanile Dr., San Diego, CA, 92182, USA

<sup>3</sup>Department of Food Chemistry and Toxicology, Faculty of Chemistry and Vienna Metabolomics Center (VIME), University of Vienna, Währingerstraße 38, 1090 Vienna, Austria

<sup>4</sup>Department of Microbiology and Ecosystem Science, Division of Microbial Ecology, Research Network Chemistry Meets Microbiology, University of Vienna, Althanstraße 14, Vienna, Austria

<sup>5</sup>Department of Chemistry, Molecular and Computational Biology, The Scripps Research Institute, 10550 North Torrey Pines Rd., La Jolla, CA, 92037, USA

+ These authors contributed equally.

\*Author to whom correspondence should be addressed:

Gary Siuzdak  
Tel: (858) 784-9415  
E-mail: [siuzdak@scripps.edu](mailto:siuzdak@scripps.edu)  
Internet: <https://masspec.scripps.edu/>

#### INDEX

|                                                                                                                               | Page |
|-------------------------------------------------------------------------------------------------------------------------------|------|
| <b>Figure S1.</b> Absence of overlap between ion 96.9255 <i>m/z</i> and phosphocholine (184.0733 <i>m/z</i> )                 | 2    |
| <b>Figure S2.</b> MS signals obtained for a cell extract analyzed with Dowex resin and f-AuNPs                                | 2    |
| <b>Figure S3.</b> Coverage obtained by performing f-AuNPs NIMS of mice colon tissues, mapped on the KEGG human metabolome map | 3    |
| <b>Figure S4.</b> Distribution of linoleic acid and related isobars in the mouse colon under different diets                  | 4    |
| <b>Figure S5.</b> Distribution of sulfate and related isobars in the mouse colon under different diets                        | 4    |

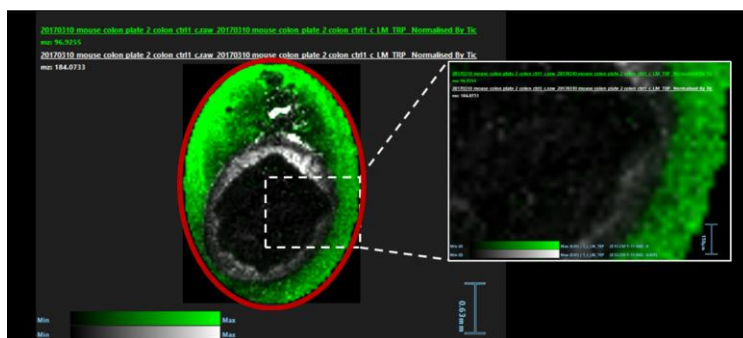

**Figure S1.** Absence of overlap between ion 96.9255  $m/z$  (from OTC tissue embedding material) and phosphocholine (184.0733  $m/z$ ). The red line indicates the area of the chip surface included in the MSI analysis.

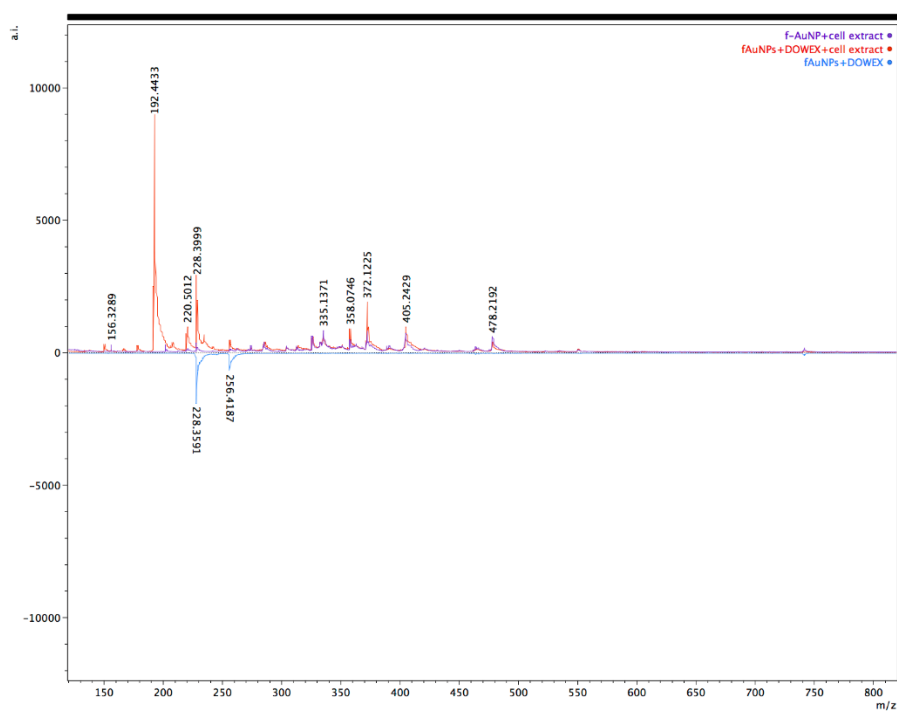

**Figure S2.** Comparison between MS signals obtained from the analysis of a cell extract using f-AuNPs alone, *versus* the same cell extract after pre-concentration with the Dowex anion exchange resin particles (1  $\mu$ L of 1 mg/mL spotted) and fAuNPs. The bottom panel shows the background effect from DOWEX resin alone.

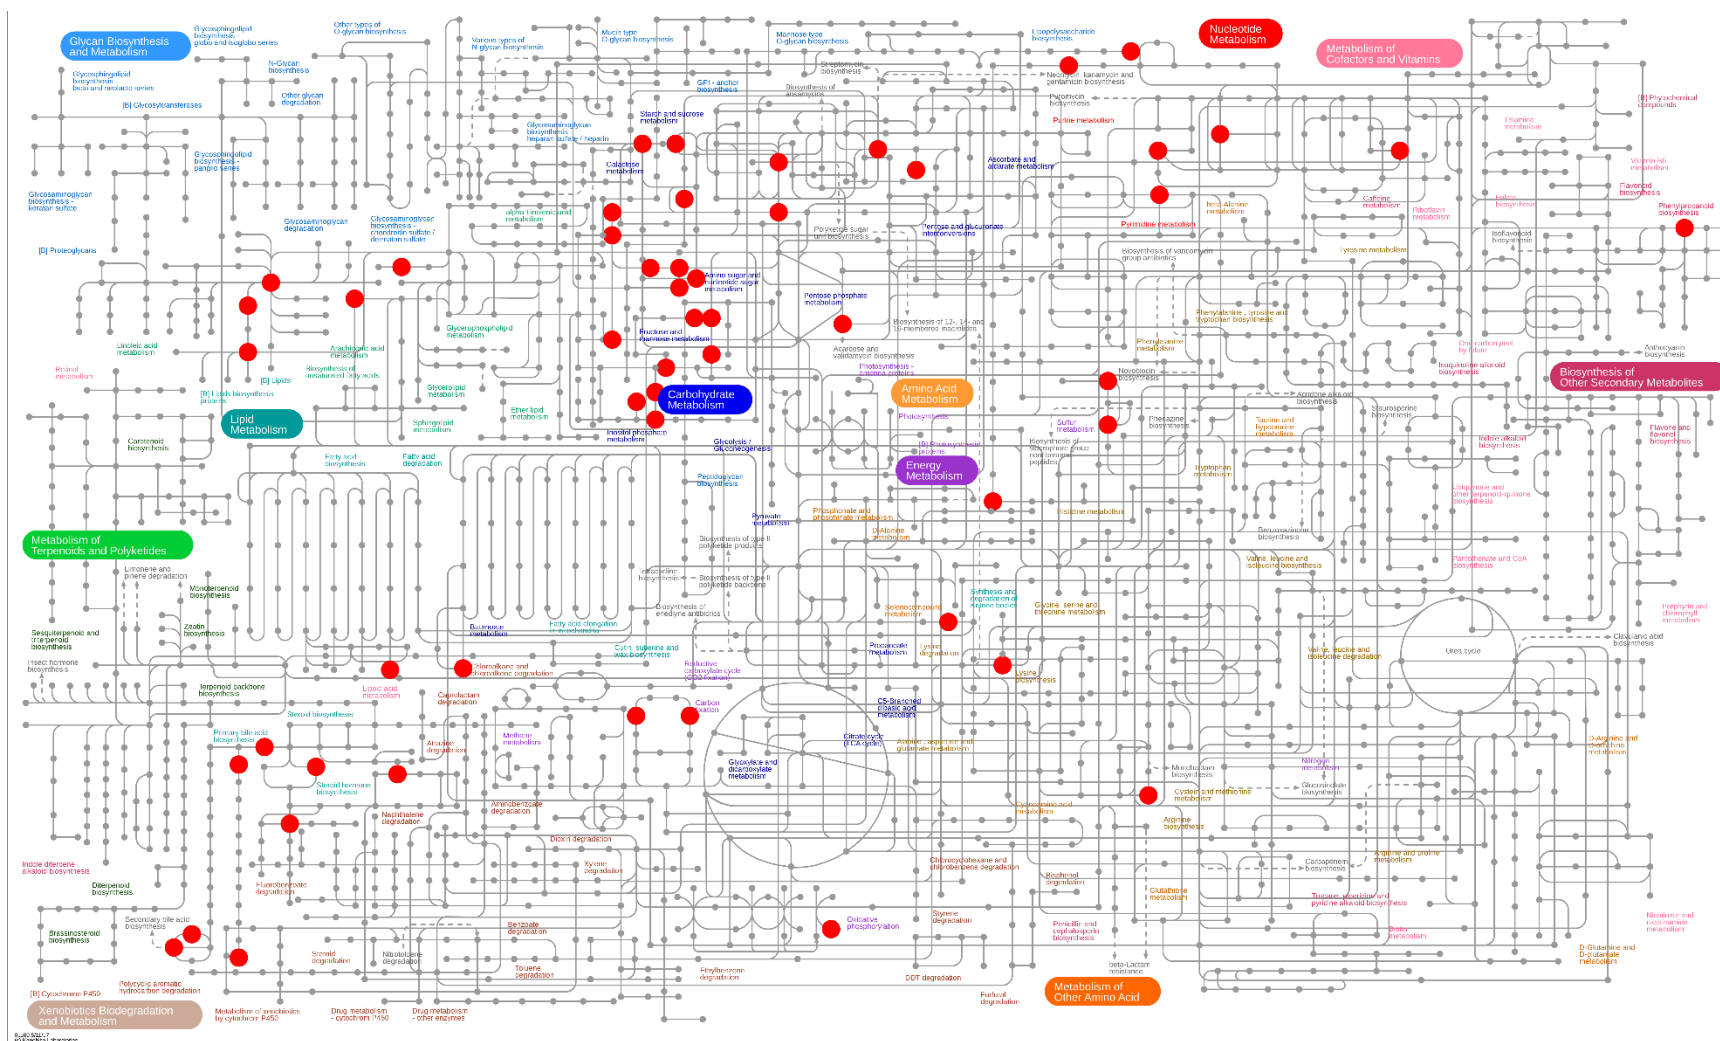

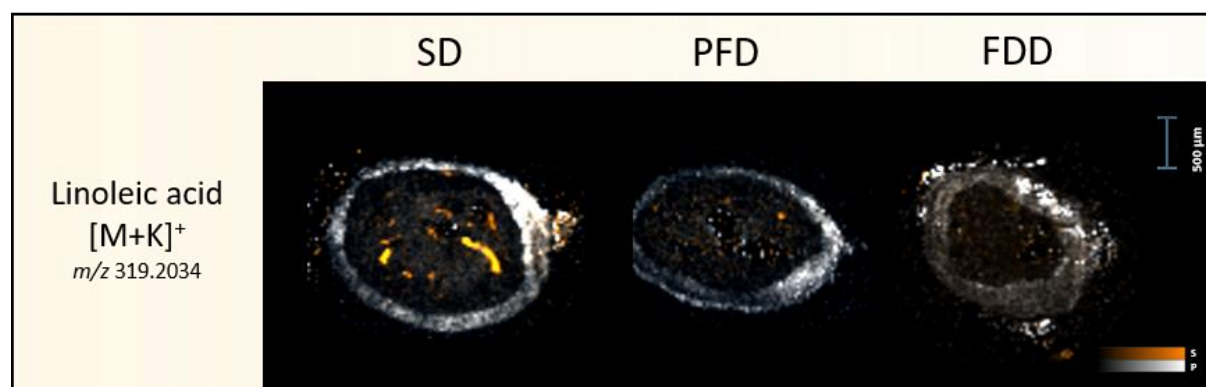

**Figure S4.** Distribution of linoleic acid and/or related isobars in the mouse colon under different diets.

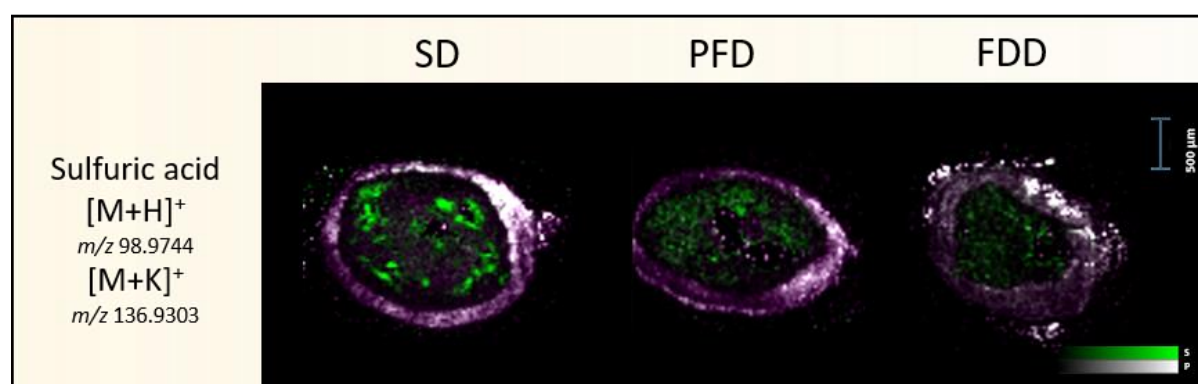

**Figure S5.** Distribution of sulfate and/or related isobars in the mouse colon under different diets.
